# Identification of Three Novel Mutations in the *GATA3* Gene Responsible for Familial Hypoparathyroidism and Deafness in the Chinese Population

Wei-Yih Chiu, Huan-Wen Chen, Hwei-Wen Chao, Lee-Tzong Yann, and Keh-Sung Tsai

Departments of Laboratory Medicine (W.-Y.C., H.-W.Cha, K.-S.T.) and Internal Medicine (W.-Y.C., L.-T.Y, K.-S.T.), National Taiwan University Hospital, Taipei 100, Taiwan; and Department of Internal Medicine (H.-W.Che), Lo-Tung Pohai Hospital, Ilan 256, Taiwan

**Background:** Familial hypoparathyroidism may be caused by mutations of several genes. The *CaSR* and *GATA3* genes are the two candidates most commonly responsible for this condition.

**Objectives:** We collected five unrelated families with familial hypoparathyroidism and examined their *CaSR* and *GATA3* genes.

**Methods:** Blood samples from these five families and 50 ethnically matched unrelated controls were acquired. Biochemistry screening and formal audiogram were performed to evaluate the affected individuals. All the exons and exon-intron boundaries of the *GATA3* and *CaSR* genes were sequenced.

**Results:** We identified three novel mutations in the *GATA3* gene responsible for familial hypoparathyroidism and deafness: 1) a frame-shift deletion occurring in codon 160 (478delG) was hypothesized to disrupt dual zinc fingers as well as one transactivating domain; 2) a

donor splice site mutation at exon 4/intron 4 boundary (IVS4 + 2 T to GCTTACTTCCC) was predicted to lead to truncated *GATA3* proteins that lack both N- and C-terminal zinc-containing fingers; and 3) a missense mutation R353S was predicted to disrupt the helical turn and thus changed the angle between the C-terminal zinc finger and the adjacent C-terminal tail. Except for a previously described polymorphism, G990R, we did not find any genetic variants in the *CaSR* gene.

**Conclusions:** This is the first article presenting mutations of the *GATA3* gene responsible for familial hypoparathyroidism and deafness in the Chinese population. Our results expand the spectrum of mutations and report the first splice donor site mutation of the *GATA3* gene. In contrast, we do not find causal sequence variants of the *CaSR* gene from our collection of familial hypoparathyroidism. (*J Clin Endocrinol Metab* 91: 4587–4592, 2006)

FAMILIAL HYPOPARATHYROIDISM is an unusual condition that may be observed as an isolated defect caused by mutation in the calcium-sensing receptor gene (*CaSR*; MIM 601199), *PTH* gene (MIM 168450), or *GCM2* gene (MIM 603716) (1–8) or as a component of a more widespread disorder, such as autoimmune polyglandular syndrome type I (MIM 240300) (9); DiGeorge's syndrome (MIM 188400) (10); or hypoparathyroidism, sensorineural deafness, and renal anomalies (HDR) syndrome (MIM 146255) (11–16). It can be inherited in an autosomal dominant (2–4, 6, 8, 11–16), autosomal recessive (1, 5, 7), or X-linked recessive (17, 18) pattern. After excluding cases of pseudohypoparathyroidism and any immunological disorder, autosomal dominant inheritance seems to be the most common pattern of familial hypoparathyroidism. In view of reports about autosomal dominant hypoparathyroidism, mutations of the calcium-sensing receptor (*CaSR*) and *GATA3* genes were most common.

In 1994, Finegold *et al.* (19) demonstrated a linkage of autosomal dominant hypocalcemia to chromosome 3q13, which harbors the gene for the *CaSR*. The *CaSR* is expressed

in tissues involved in calcium homeostasis, including parathyroid gland, thyroid C-cell, kidney, and bone. In parathyroid cells, binding of calcium ion to *CaSR* decreases PTH secretion by acting as a calcium sensor. In kidney, *CaSR* activation inhibits the reabsorption of calcium (20). It has been estimated that approximately 40% of cases of idiopathic hypoparathyroidism were harboring activating *CaSR* mutations (21). Recently *GATA3*, a member of the GATA-binding family of transcription factors, was shown to be involved in human HDR syndrome (11–16), which has an autosomal dominant inheritance pattern. *GATA3* is a dual zinc finger transcription factor. Human *GATA3* expression has been detected in the developing parathyroid gland, inner ear, and kidney, together with thymus and central nervous system (22).

As a candidate gene approach, we investigated patients with familial hypoparathyroidism for the *GATA3* and *CaSR* abnormalities.

## Patients and Methods

### Patients and controls

The diagnosis of familial hypoparathyroidism was based on the family history and presence of hypocalcemia and hyperphosphatemia in association with low or an inappropriately normal level of serum intact PTH (i-PTH). Patients with postsurgical hypoparathyroidism were excluded. None of the patients had any features, such as mucocutaneous candidiasis or facial abnormalities, that could be suggestive of hypoparathyroidism related to the polyglandular autoimmune syndrome

First Published Online August 15, 2006

Abbreviations: *CaSR*, Calcium-sensing receptor; HDR, hypoparathyroidism, sensorineural deafness, and renal anomalies; i-PTH, intact PTH.

JCEM is published monthly by The Endocrine Society (<http://www.endo-society.org>), the foremost professional society serving the endocrine community.

type I or DiGeorge’s syndrome. Blood samples from the patients, their family members, and 50 ethnically matched unrelated controls were acquired after having obtained informed and written consent from each participant according to a protocol reviewed and approved by the local ethical research committee. Genomic DNA was extracted from 0.2 ml of whole blood using a commercial DNA extraction kit (NucleoSpin blood; Macherey-Nagel GmbH & Co. KG, Düren, Germany) according to the manufacturer’s protocol.

Clinical laboratory investigations

All patients and their family members were evaluated both clinically and biochemically. Plasma creatinine, albumin, total calcium, and phosphorus concentrations were measured using commercially available diagnostic kits according to the manufacturer’s instructions. Specifically, serum i-PTH concentrations (biologically active molecule, 1–84 amino acids full length) were measured using a two-site immunochemiluminometric assay on an Immulite 2000 machine (Diagnostics Product Corp., Los Angeles, CA). Urinalysis, nephrosonography, and formal audiogram were performed to evaluate renal and hearing impairment of all the probands and some of the family members.

Mutation detection and analysis

All the coding exons and exon-intron boundaries of the GATA3 and CaSR genes were amplified by PCR as described (12, 23). Subsequently, the PCR products were purified and subjected to cycle sequencing reaction by a BigDye terminator cycle sequencing kit (version 3.1; Applied Biosystems, Foster City, CA). All the genetic variants detected in the probands, which were confirmed by repeat DNA sequence analysis on independently obtained PCR products, were demonstrated to cosegregate with the disorder and to be absent in the DNA obtained from 50 unrelated individuals. Restriction enzyme genotyping using BsmF I was performed to determine the disease segregation pattern of A1059T (amino acid R353S) gene variant within the family as well as the frequency in 100 normal chromosomes.

To examine gene features, like intron/exon boundaries, the HMM-based gene structure predictor is useful. We used the FGENESH program (www.softberry.com) based on the consensus sequence of exon-intron junctions (ag . . . gt rule of intronic sequence) as well as on the codon usage within ORF to predict the effect of the splice donor mutation.

Based on the determined NMR structure of C-terminal DNA binding

domain of GATA1 (24), this homologous domain of GATA3 consists of a core that contains a zinc coordinated by four cysteines and a carboxyl-terminal tail. The core interacts with the major groove of the DNA, and the carboxyl-terminal tail wraps around into the minor groove. The residue 353 of human GATA3 is located in the long loop that connects the core and the carboxyl-terminal tail. We used the NNpredict software (<http://www.cmpharm.ucsf.edu/~nomi/nnpredict.html>) to determine the effect of R353S on human GATA3 structure. Besides, key amino-acid positions that are important for maintaining the three-dimensional structure of a protein and/or its functions are often under strong evolutionary constraints. Thus, the biological importance of a residue often correlates with its level of evolutionary conservation within the protein family. ConSurf (<http://consurf.tau.ac.il/>) (25, 26) is a web-based tool that automatically calculates evolutionary conservation scores and maps them on protein structures. The run was carried out using default parameters and a PDB file that was acquired from CPHmodels 2.0 server (<http://www.cbs.dtu.dk/services/CPHmodels/>) (27).

Results

Clinical findings

Twelve patients with familial hypoparathyroidism from five unrelated families were ascertained (Table 1). In these 12 cases, age at onset of hypoparathyroidism varied from 7 to 50 yr; six were female. Unexplained hypocalcemia (median 1.58 mM) and hyperphosphatemia (median 1.74 mM) were present in eight patients. This was associated with tetany in six patients and seizure in two patients. Computerized tomography of the head performed in those two patients (C/II.3 and D/II.1) with grand mal seizure showed calcification at bilateral cerebrum, basal ganglia, and frontal white matter. Bilateral sensorineural hearing loss was identified in three probands and their family members (families A, B, and C). In addition, renal lesion was radiologically confirmed in one case (patient B/III.2). When she was 5 yr old, renal insufficiency was noted (creatinine clearance 39 ml/min, normal range 120–140 ml/min). Nephrosonography disclosed small size of the kidneys (Table 1). Intravenous py-

TABLE 1. Clinical and biochemical presentation in patients with familial hypoparathyroidism

| Patients | Hypoparathyroidism |                 |                |                    |                  |                      | Renal findings |           |                                  | Deafness (age <sup>b</sup> )  |
|----------|--------------------|-----------------|----------------|--------------------|------------------|----------------------|----------------|-----------|----------------------------------|-------------------------------|
|          | Symptoms           | Ca <sup>a</sup> | P <sup>a</sup> | i-PTH <sup>a</sup> | Cre <sup>a</sup> | Age, yr <sup>b</sup> | Proteinuria    | Hematuria | Length (right/left) <sup>a</sup> |                               |
| A        |                    |                 |                |                    |                  |                      |                |           |                                  |                               |
| II.2     | Tetany             | 1.6             | 1.58           | 4.3                | 1.4              | 50                   | —              | —         | 10.6/9.8                         | SNHL (childhood) <sup>c</sup> |
| III.1    | Asymptomatic       | 2.26            | 1.29           | 23.2               | 1.1              | 23 <sup>d</sup>      | —              | —         | 10.9/9.9                         | SNHL (10) <sup>c</sup>        |
| III.2    | Asymptomatic       | 2.14            | 1.55           | 7.17               | 1.0              | 18                   | —              | —         | 10.7/10.3                        | SNHL (17)                     |
| B        |                    |                 |                |                    |                  |                      |                |           |                                  |                               |
| II.2     | Tetany             | 1.55            | 1.71           | 17.1               | 0.8              | 33                   | —              | —         | 9.0/9.2 <sup>e</sup>             | SNHL (childhood) <sup>c</sup> |
| III.2    | Tetany             | 1.78            | 1.58           | 13.0               | 2.7              | 16                   | +              | +         | 6.5/6.7                          | SNHL (2) <sup>c</sup>         |
| C        |                    |                 |                |                    |                  |                      |                |           |                                  |                               |
| II.3     | Seizure, CBG       | 1.18            | 2.03           | <3.0               | 1.0              | 32                   | —              | —         | 10.1/9.9                         | SNHL (childhood) <sup>c</sup> |
| III.1    | Asymptomatic       | 2.21            | 1.55           | 26.4               | 0.7              | 10 <sup>d</sup>      | —              | —         | N/A                              | SNHL (5) <sup>c</sup>         |
| III.2    | Asymptomatic       | 2.09            | 1.81           | 14.6               | 0.5              | 7                    | —              | —         | N/A                              | SNHL (4) <sup>c</sup>         |
| D        |                    |                 |                |                    |                  |                      |                |           |                                  |                               |
| II.1     | Seizure, CBG       | 1.89            | 1.52           | <3.0               | 1.3              | 37                   | —              | —         | N/A                              | None                          |
| III.2    | Tetany             | 1.88            | 1.91           | 5.08               | 1.0              | 18                   | —              | —         | N/A                              | None                          |
| E        |                    |                 |                |                    |                  |                      |                |           |                                  |                               |
| II.2     | Tetany             | 1.54            | 1.78           | 5.1                | 1.0              | 27                   | —              | —         | N/A                              | None                          |
| II.3     | Tetany             | 1.51            | 1.84           | 3.2                | 0.7              | 30                   | —              | —         | N/A                              | None                          |

CBG, Calcification of basal ganglia; Cre, creatinine; N/A, not available; SNHL, sensorineural hearing loss; +, positive; –, negative.  
<sup>a</sup> Reference value: Ca, 2.02–2.60 mmol/liter; P, 0.87–1.45 mmol/liter; i-PTH, 12–72 ng/liter; creatinine, 0.8–1.2 mg/dl in men and 0.6–0.9 mg/dl in women; and renal length in our population, 10.52 ± 0.95 cm.  
<sup>b</sup> Age at diagnosis of hypoparathyroidism or deafness.  
<sup>c</sup> Using hearing aids.  
<sup>d</sup> Present age.  
<sup>e</sup> The values are regarded as normal in terms of her body height and weight.

eulography showed vesicoureteral reflux at both sides. Abdominal magnetic resonance imaging revealed renal hypoplasia with lobulated contour in kidney shape. On the last examination at age 16 yr, bilateral contracted kidneys (right/left side = 5.9/6.5 cm) with chronic renal failure were noticed.

### Mutation analysis

Direct sequencing of the *CaSR* gene revealed the sequences in coding exons, and splice junctions were well conserved except one gene variant: an A-to-G transition at nucleotide 2968 (starting from ATG) in exon 7. This change resulted in a substitution of arginine for glycine (G990R) and was present in one or both alleles in nine of the 12 cases. The frequencies of A/A, A/G, and G/G genotypes in the patients were 8.3, 66.7, and 25%, respectively. It was noted that neither the 990G allele nor 990R allele cosegregated with the hypocalcemia/hypoparathyroidism within the families we studied. This variant, G990R, was previously reported as a benign polymorphism without contribution to hypocalcemia (23, 28).

Sequence analysis of the *GATA3* gene disclosed three heterozygous genetic variants. The first, in family A, was a single-base deletion at nucleotide 478 of the cDNA sequence (478delG) located in exon 3 (Fig. 1A). This variant is predicted to result in a frameshift from codon 160 and a premature termination at codon 194. This mutation was present only in the affected family members and was not identified in any of the unaffected relatives or ethnically matched controls. The second sequence variant, found in family B, involved a *t* to *gcttacttccc* substitution of the invariant *gt* in

junction of exon-intron 4 (IVS 4 + 2 *T* → *GCTTACTTCCC* mutation) (Fig. 1B). This mutation occurred in the affected family members and not in the unaffected relatives and control samples. The *FGENESH* correctly predicted the gene structures, including coding regions through exon 2 to exon 5, of the reference *GATA3* gene sequence. In contrast, exon 4 was skipped and the fusion of exons 3 and 5 leads to a reading frameshift at position V260 in this splice donor mutant (Fig. 2). Family C contained a heterozygous A to T transversion at nucleotide 1059 (1059A > T) of the *GATA3* cDNA sequence (Fig. 1C). This mutation resided in exon 6 and was predicted to result in the substitution of serine for an arginine residue at position 353 of the *GATA3* amino-acid sequence. This mutation was not seen in sequences from unaffected relatives. The base change created a *BsmF* I restriction site that facilitated screening of control samples. All affected family members demonstrated the presence of the *BsmF* I restriction site; however, no digestion was observed in unaffected family members or an additional 50 unrelated control samples. Using the ConSurf server (25, 26), we found that R353 is extremely well conserved among various homologous proteins in humans and across species (score = 9; range 1–9; calculation performed on 50 unique sequences) (Fig. 3). The three-dimensional structure of the carboxyl-terminal DNA binding domain of human *GATA3* and the position of R353 were shown in Fig. 3. This mutant, R353S, was predicted to disrupt the helix turn composed of residue 355 to 358 by using the NNpredict software with alpha/beta tertiary structure class for prediction.

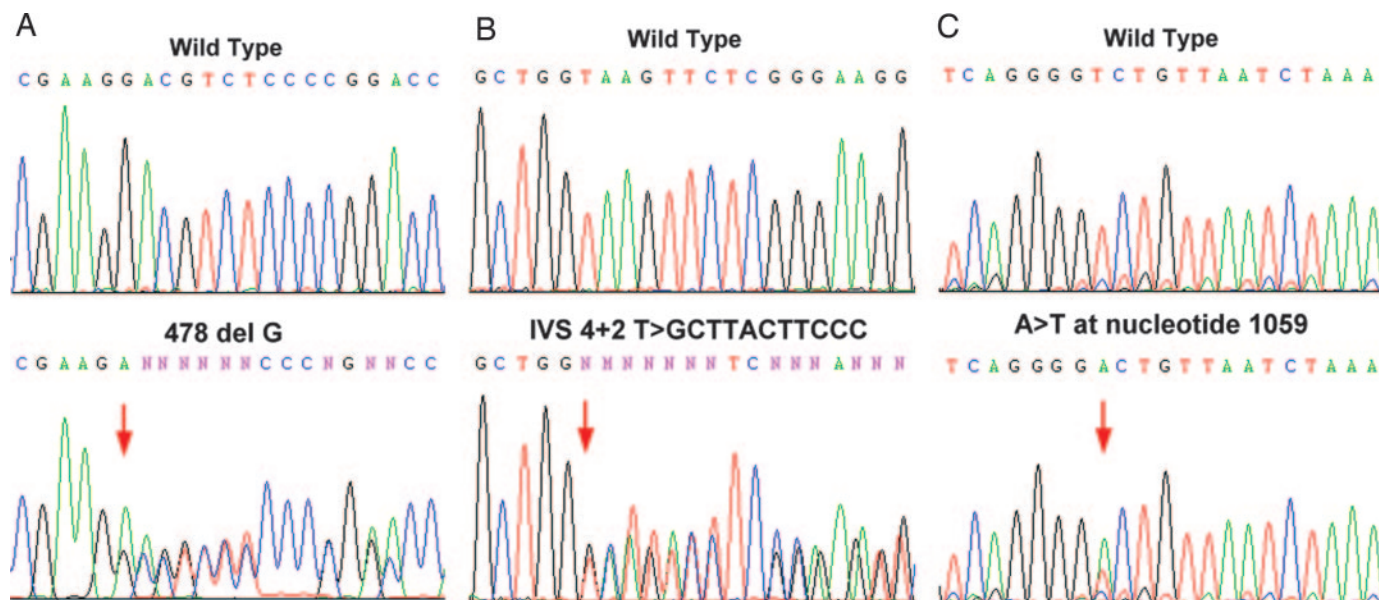

FIG. 1. Results of mutation analysis. The wild-type sequences are given for comparison (upper panels). Arrow denotes mutation site. A, Direct sequencing reveals a heterozygous G deletion at position 478 of the *GATA3* cDNA sequence. This mutation was identified in case II.2, III.1, and III.2 of family A. B, Sequence analysis disclosed heterozygous mutant sequence in case II.2, III.2 of family B. This splice donor mutation, IVS4 + 2 *T* → *GCTTACTTCCC*, in the *GATA3* gene cosegregated with the hypoparathyroidism and hearing loss phenotypes in family B. C, Sequence of antisense strand in exon 6 in family C, Arrow denotes heterozygous A to T transversion at nucleotide 1059 of the cDNA sequence. The variant is predicted to result in the substitution of serine for an arginine residue at position 353 of the *GATA3* amino-acid sequence. Cosegregation of this R353S mutation and its heterozygosity in the affected members (II.3, III.1, and III.2) were demonstrated. This mutation was not detected in 100 chromosomes from 50 unrelated normal individuals.



FIG. 2. Ideogram of putative splicing consequence of the IVS 4 + 2 T → GCTTACTTCCC mutation. Introns and exon 2 of the GATA3 gene are not drawn to scale. The *FGENESH* correctly predicts gene structure, including coding regions in exons 3–5, of the reference *GATA3* sequence (upper panel). By contrast, the novel *t* to *gcttacttccc* substitution at the splice donor site of intron 4 results in exon 4 skipping (middle panel) and shifting of the open reading frame (bottom panel).

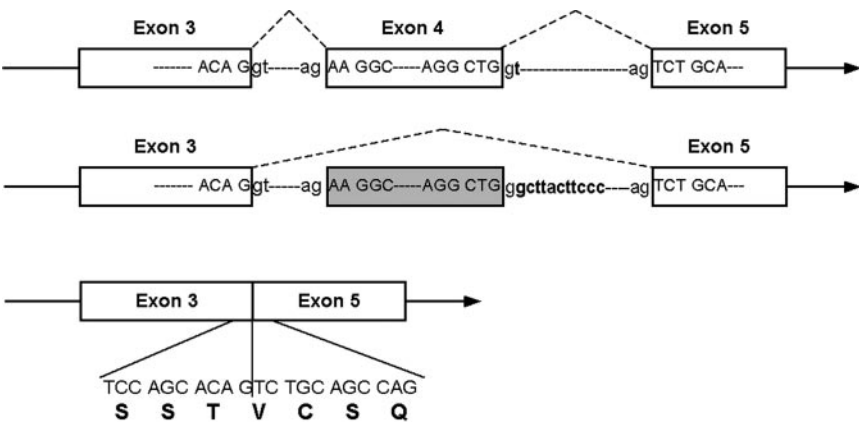

Discussion

The combination of hypoparathyroidism, sensorineural deafness, and renal anomalies was termed the HDR syndrome. Recently deletion-mapping studies and subsequent mutation analysis revealed that haploinsufficiency for *GATA3* due to various mutations is the underlying mechanism of this syndrome (12–16, 29, 30). In the present study, we examined five families with familial hypoparathyroidism and found that in the three families (A–C) with hearing problems, there were three different kinds of mutations of the *GATA3* gene. We found that even within families with patients harboring identical *GATA3* mutations, there appears to be a variable penetrance of renal abnormalities as illustrated by family B, and that of parathyroid disorder as illustrated by families A and C (Table 1 and Fig. 4). This provided further evidence that haploinsufficiency of genes involved in human development frequently shows a wide range of penetrance and expressivity, depending on other genetic and environment factors (31). The clinical feature of early-onset deafness is the most completely penetrant part of the HDR syndrome so that the diagnosis can be made by

identifying the invariant hearing problem and the accompanying hypoparathyroidism, not by a genetic screen. *GATA3* encodes a 444-amino-acid transcription factor that contains two transactivating and two zinc finger DNA-binding domains. The N-terminal finger (ZnF1) is encoded by residues 264–288 located in exon 4, and the C-terminal finger (ZnF2) is encoded by residues 318–342 located in exon 5. Functional study had shown that the ZnF2 is essential for DNA binding, whereas the ZnF1 appears to stabilize this binding and interact with other zinc finger protein, such as the Friends of GATA (13). Up to now, 18 causal mutations of the *GATA3* gene have been reported (12–16, 30). All of this evidence established the role of *GATA3* haploinsufficiency in the etiology of this developmental disorder. Mutations that disrupt either ZnF2 or the adjacent C-terminal tail lead to a loss of DNA binding, whereas those that disrupt ZnF1 do not result in loss of DNA binding but instead alter DNA binding affinity (13). In our present study, the 478delG mutation in family A represented a frameshift from codon 160 with a premature termination at codon 194. The deletion was hypothesized to disrupt dual zinc fingers as well as one trans-

FIG. 3. Surface mapping of phylogenetic information of the C-terminal zinc-containing DNA binding domain (residues 312–375 of cDNA) of human *GATA-3*. It is presented using a space-filling (A) and cartoon model (B). The amino acids are colored by their conservation grades using the color-coding bar, with turquoise through maroon indicating variable through conserved. Amino-acid positions, for which the inferred conservation level was assigned with low confidence, are marked with light yellow. The residual 353 of the human *GATA3* is colored maroon. The three-dimensional structure of the C-terminal DNA binding domain of human *GATA3* was based on the NMR structure of that of chicken *GATA1* (protein code: 2gatA). Arrow indicates R353. The helical turn (composed of residues 355–358) and carboxyl-terminal tail (composed of residues 363–370) of this DNA binding domain of human *GATA3* are shown in the cartoon model.

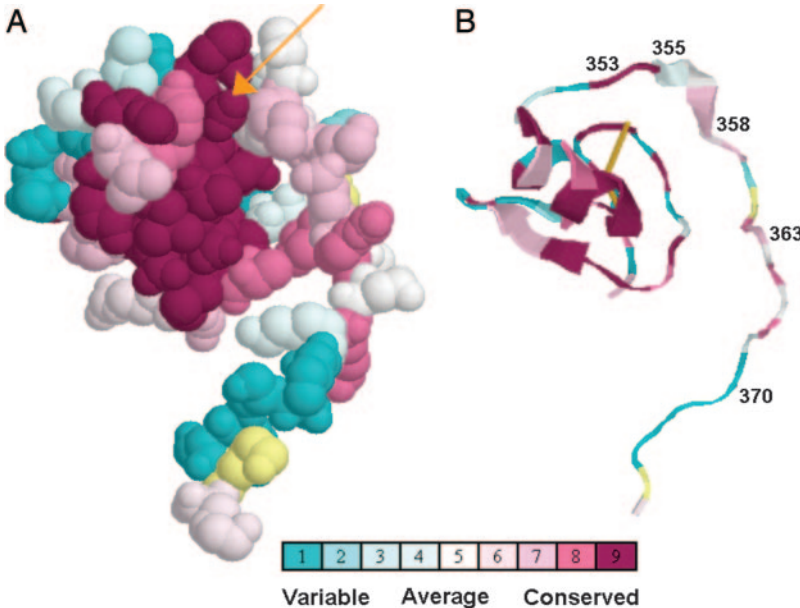

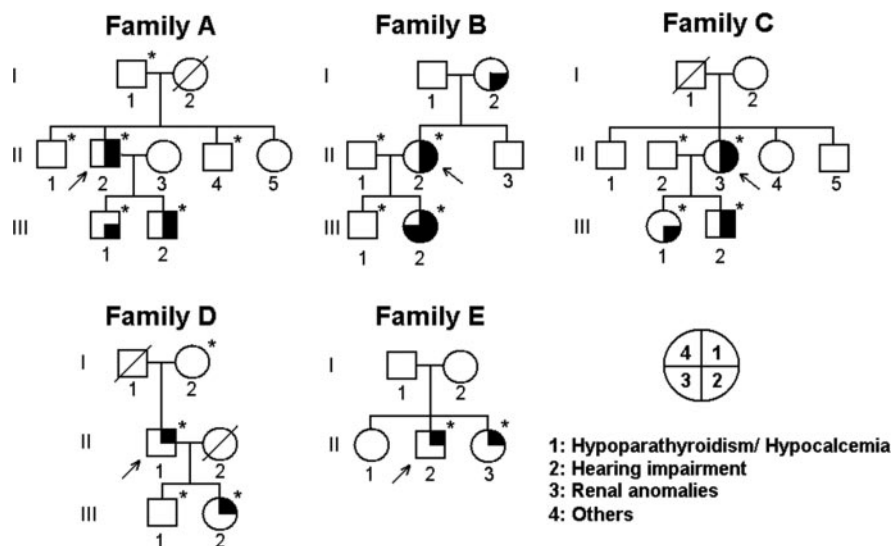

FIG. 4. Familial hypoparathyroidism pedigrees. Arrow denotes the proband in each family, asterisks indicate subjects who underwent blood sampling, and filled symbols in each quartered area represent the features in affected family members.

activating domain. The splice donor mutation at exon 4/intron 4 boundary (IVS 4 + 2 T → GCTTACTTCCC) in family B was predicted to lead to exon 4 skipping and a reading frameshift at position V260. This mutant produced truncated GATA3 proteins that lack both zinc finger DNA-binding domains.

The possibility that the R353S substitution found in family C might be a rare polymorphism cannot be excluded formally, despite the absence of this polymorphism in 100 chromosomes from unaffected controls because functional studies have not been performed. However, the arginine at codon 353 is located within the C-terminal zinc-containing DNA binding domain and is extremely conserved among various homologous proteins in humans and across species, suggesting the biological importance of this residue. Thus, the R353S substitution is considered to be a causative mutation rather than a rare polymorphism. This mutant, R353S, was predicted to disrupt the helix turn composed of residues 355–358. This would lead to a change of directionality of the carboxyl-terminal tail, which is composed of residues 363–370 and is an essential determinant of specific DNA binding in the minor groove (24). The complex of zinc-containing DNA binding domain resembles a hand holding a rope with the palm and fingers representing the protein core, and the thumb, the carboxyl-terminal tail. The long axis of the protein core lies at an angle of approximately 40° to the base planes of the DNA, whereas the carboxyl-terminal tail is approximately parallel to the base planes (24). Thus, change of the angle between the core and carboxyl-terminal tail would be expected to have a significant impact on the specific function of this transcription factor.

In conclusion, the present study, presenting three newly found mutations, is the first article presenting mutations of the GATA3 gene responsible for familial hypoparathyroidism and deafness in the Chinese population. Our results expand the spectrum of disease-causing mutations, provide further evidence that HDR is caused by the haploinsufficiency of GATA3, and report the first splice donor mutation. The commonly described polymorphism, G990R, and mutations in the *CaSR* gene are not linked to familial hypopar-

athyroidism in the group of patients we studied. To our knowledge, literatures about mutations in the *CaSR* gene leading to hypoparathyroidism were absent in our population. Neither the GATA3 nor the *CaSR* abnormalities were identified in the remaining two families. Additional studies are required to determine the involvement of other regions including intronic and regulatory sequences, or other candidate genes, in the pathogenesis of familial hypoparathyroidism. In our opinion, mutations of the GATA3 gene should be considered in patients with a coexistence of family hypoparathyroidism and sensorineural hearing loss, despite of absence of renal involvement. Besides, it is crucial to evaluate the auditory and renal functions in all patients with familial hypoparathyroidism.

### Acknowledgments

We acknowledge the help of the families for participating in the present study. We are grateful to the Department of Medical Research, National Taiwan University Hospital, for DNA sequencing services.

Received April 21, 2006. Accepted August 3, 2006.

Address all correspondence and requests for reprints to: Keh-Sung Tsai, M.D., Ph.D., Department of Laboratory Medicine, National Taiwan University Hospital, No. 7, Chung-Shan South Road, Taipei 100, Taiwan. E-mail: kstsaimd@ha.mc.ntu.edu.tw.

Disclosure summary: The authors have nothing to disclose.

### References

- Parkinson DB, Thakker RV 1992 A donor splice site mutation in the parathyroid hormone gene is associated with autosomal recessive hypoparathyroidism. *Nat Genet* 1:149–152
- Pollak MR, Brown EM, Estep HL, McLaine PN, Kifor O, Park J, Hebert SC, Seidman CE, Seidman JG 1994 Autosomal dominant hypocalcaemia caused by a  $\text{Ca}^{2+}$ -sensing receptor gene mutation. *Nat Genet* 8:303–307
- Baron J, Winer KK, Yanovski JA, Cunningham AW, Laue L, Zimmerman D, Cutler Jr GB 1996 Mutations in the  $\text{Ca}^{2+}$ -sensing receptor gene cause autosomal dominant and sporadic hypoparathyroidism. *Hum Mol Genet* 5:601–606
- Watanabe T, Bai M, Lane CR, Matsumoto S, Minamitani K, Minagawa M, Niimi H, Brown EM, Yasuda T 1998 Familial hypoparathyroidism: identification of a novel gain of function mutation in transmembrane domain 5 of the calcium-sensing receptor. *J Clin Endocrinol Metab* 83:2497–2502
- Sunthornthepvarakul T, Churesigaew S, Ngowngarmratana S 1999 A novel mutation of the signal peptide of the preproparathyroid hormone gene asso-

- ciated with autosomal recessive familial isolated hypoparathyroidism. *J Clin Endocrinol Metab* 84:3792–3796
6. Lienhardt A, Garabedian M, Bai M, Sinding C, Zhang Z, Lagarde JP, Boulesteix J, Rigaud M, Brown EM, Kottler ML 2000 A large homozygous or heterozygous in-frame deletion within the calcium-sensing receptor's carboxylterminal cytoplasmic tail that causes autosomal dominant hypocalcemia. *J Clin Endocrinol Metab* 85:1695–1702
  7. Ding C, Buckingham B, Levine MA 2001 Familial isolated hypoparathyroidism caused by a mutation in the gene for the transcription factor GCMB. *J Clin Invest* 108:1215–1220
  8. Hendy GN, Minutti C, Canaff L, Pidasheva S, Yang B, Nouhi Z, Zimmerman D, Wei C, Cole DE 2003 Recurrent familial hypocalcemia due to germline mosaicism for an activating mutation of the calcium-sensing receptor gene. *J Clin Endocrinol Metab* 88:3674–3681
  9. Heino M, Scott HS, Chen Q, Peterson P, Maebpaa U, Papasavvas MP, Mittaz L, Barras C, Rossier C, Chrousos GP, Stratakis CA, Nagamine K, Kudoh J, Shimizu N, Maclaren N, Antonarakis SE, Krohn K 1999 Mutation analyses of North American APS-1 patients. *Hum Mutat* 13:69–74
  10. Garabedian M 1999 Hypocalcemia and chromosome 22q11 microdeletion. *Genet Couns* 10:389–394
  11. Hasegawa T, Hasegawa Y, Aso T, Koto S, Nagai T, Tsuchiya Y, Kim KC, Ohashi H, Wakui K, Fukushima Y 1997 HDR syndrome (hypoparathyroidism, sensorineural deafness, renal dysplasia) associated with del(10)(p13). *Am J Med Genet* 73:416–418
  12. Van Esch H, Groenen P, Nesbit MA, Schuffenhauer S, Lichtner P, Vanderlinden G, Harding B, Beetz R, Bilous RW, Holdaway I, Shaw NJ, Fryns JP, Van de Ven W, Thakker RV, Devriendt K 2000 GATA3 haplo-insufficiency causes human HDR syndrome. *Nature* 406:419–422
  13. Nesbit MA, Bowl MR, Harding B, Ali A, Ayala A, Crowe C, Dobbie A, Hampson G, Holdaway I, Levine MA, McWilliams R, Rigden S, Sampson J, Williams AJ, Thakker RV 2004 Characterization of GATA3 mutations in the hypoparathyroidism, deafness, and renal dysplasia (HDR) syndrome. *J Biol Chem* 279:22624–22634
  14. Muroya K, Hasegawa T, Ito Y, Nagai T, Isotani H, Iwata Y, Yamamoto K, Fujimoto S, Seishu S, Fukushima Y, Hasegawa Y, Ogata T 2001 GATA3 abnormalities and the phenotypic spectrum of HDR syndrome. *J Med Genet* 38:374–380
  15. Zahirieh A, Nesbit MA, Ali A, Wang K, He N, Stangou M, Bamichas G, Sombolos K, Thakker RV, Pei Y 2005 Functional analysis of a novel GATA3 mutation in a family with the hypoparathyroidism, deafness, and renal dysplasia syndrome. *J Clin Endocrinol Metab* 90:2445–2450
  16. Mino Y, Kuwahara T, Mannami T, Shioji K, Ono K, Iwai N 2005 Identification of a novel insertion mutation in GATA3 with HDR syndrome. *Clin Exp Nephrol* 9:58–61
  17. Andrew Nesbit M, Bowl MR, Harding B, Schlessinger D, Whyte MP, Thakker RV 2004 X-linked hypoparathyroidism region on Xq27 is evolutionarily conserved with regions on 3q26 and 13q34 and contains a novel P-type ATPase. *Genomics* 84:1060–1070
  18. Bowl MR, Nesbit MA, Harding B, Levy E, Jefferson A, Volpi E, Rizzoti K, Lovell-Badge R, Schlessinger D, Whyte MP, Thakker RV 2005 An interstitial deletion-insertion involving chromosomes 2p25.3 and Xq27.1, near SOX3, causes X-linked recessive hypoparathyroidism. *J Clin Invest* 115:2822–2831
  19. Finegold DN, Armitage MM, Galiani M, Matisse TC, Pandian MR, Perry YM, Deka R, Ferrell RE 1994 Preliminary localization of a gene for autosomal dominant hypoparathyroidism to chromosome 3q13. *Pediatr Res* 36:414–417
  20. Brown EM, MacLeod RJ 2001 Extracellular calcium sensing and extracellular calcium signaling. *Physiol Rev* 81:239–297
  21. Lienhardt A, Bai M, Lagarde JP, Rigaud M, Zhang Z, Jiang Y, Kottler ML, Brown EM, Garabedian M 2001 Activating mutations of the calcium-sensing receptor: management of hypocalcemia. *J Clin Endocrinol Metab* 86:5313–5323
  22. Debacker C, Catala M, Labastie MC 1999 Embryonic expression of the human GATA-3 gene. *Mech Dev* 85:183–187
  23. Uckun-Kitapci A, Underwood LE, Zhang J, Moats-Staats B 2005 A novel mutation (E767K) in the second extracellular loop of the calcium sensing receptor in a family with autosomal dominant hypocalcemia. *Am J Med Genet A* 132:125–129
  24. Omichinski JG, Clore GM, Schaad O, Felsenfeld G, Trainor C, Appella E, Stahl SJ, Gronenborn AM 1993 NMR structure of a specific DNA complex of Zn-containing DNA binding domain of GATA-1. *Science* 261:438–446
  25. Landau M, Mayrose I, Rosenberg Y, Glaser F, Martz E, Pupko T, Ben-Tal N 2005 ConSurf 2005: the projection of evolutionary conservation scores of residues on protein structures. *Nucleic Acids Res* 33:W299–W302
  26. Glaser F, Pupko T, Paz I, Bell RE, Bechor-Shental D, Martz E, Ben-Tal N 2003 ConSurf: identification of functional regions in proteins by surface-mapping of phylogenetic information. *Bioinformatics* 19:163–164
  27. Lund O, Nielsen M, Lundegaard C, Worning P, CPHmodels 2.0: X3M a computer program to extract 3D models. The CASP5 conference, California, 2002, p A102 (Abstract)
  28. Hendy GN, D'Souza-Li L, Yang B, Canaff L, Cole DE 2000 Mutations of the calcium-sensing receptor (CASR) in familial hypocalciuric hypercalcemia, neonatal severe hyperparathyroidism, and autosomal dominant hypocalcemia. *Hum Mutat* 16:281–296
  29. Lichtner P, König R, Hasegawa T, Van Esch H, Meitinger T, Schuffenhauer S 2000 An HDR (hypoparathyroidism, deafness, renal dysplasia) syndrome locus maps distal to the DiGeorge syndrome region on 10p13/14. *J Med Genet* 37:33–37
  30. Adachi M, Tachibana K, Asakura Y, Tsuchiya T 2006 A novel mutation in the GATA3 gene in a family with HDR syndrome (hypoparathyroidism, sensorineural deafness and renal anomaly syndrome). *J Pediatr Endocrinol Metab* 19:87–92
  31. Fisher E, Scambler P 1994 Human haploinsufficiency—one for sorrow, two for joy. *Nat Genet* 7:5–7
